# Supplementary material for: Study of the Photocatalytic Degradation of Highly Abundant Pesticides in Agricultural Soils
Source: MDPI journal article supplement (doi:10.3390/molecules27030634), 2022-01-19
Supplement: s1 [file s1]

**Table S1.** Summary of all the pesticide residues found in 10 soil samples in Al Kharj district, Saudi Arabia.

**Pesticide Residues Levels in Al kharj Surface Soil Samples  
(mg/kg = ppm)**

| Samples # | Farms Type | Chlorpyrifos<br>methyl OPPs | Dimethoate<br>OPPs | Atrazine<br>HERB | Primiphos-<br>methyl OPPs | Chlorpyrifos<br>OPPs | Dicofol<br>OCPs | Methidathion<br>OPPs | Heptachlor<br>OCPs | Endosulfan<br>OCPs | Carbendazim<br>FUNG. | Carbaryl<br>CARB | Ethion<br>OPPs | Diazinon<br>OPPs | Deltamethrin | PYRCypermethrin | PYR         | β- Cyfluthrin<br>PYR | Methomyl<br>CARB |
|-----------|------------|-----------------------------|--------------------|------------------|---------------------------|----------------------|-----------------|----------------------|--------------------|--------------------|----------------------|------------------|----------------|------------------|--------------|-----------------|-------------|----------------------|------------------|
| 1         | Dates      | 1.28± 0.011                 | 1.24± 0.015        | 1.22± 0.023      | 0.83± 0.009               | 0.85± 0.012          | 0.87± 0.011     | 0.28± 0.003          | 1.88± 0.022        | 1.85± 0.034        | 1.86± 0.033          | 1.78± 0.023      | 1.79± 0.028    | 1.81± 0.028      | 0.31± 0.003  | 0.33± 0.002     | 0.34± 0.005 | 0.79± 0.011          | 0.73± 0.003      |
| 2         | Dates      | 2.45± 0.018                 | 2.35± 0.038        | 2.37± 0.034      | 0.58± 0.005               | 0.58± 0.008          | 0.55± 0.004     | 0.21± 0.004          | 0.82± 0.011        | 0.84± 0.014        | 0.81± 0.018          | 0.49± 0.015      | 0.44± 0.007    | 0.49± 0.011      | 0.17± 0.001  | 0.19± 0.002     | 0.13± 0.003 | 1.45± 0.024          | 1.52± 0.038      |
| 3         | Dates      | 2.21± 0.021                 | 2.23± 0.022        | 2.25± 0.022      | 0.69± 0.007               | 0.71± 0.011          | 0.65± 0.005     | 0.11± 0.003          | 1.34± 0.019        | 1.36± 0.023        | 1.31± 0.015          | 0.78± 0.018      | 0.79± 0.012    | 0.74± 0.009      | 0.28± 0.003  | 0.22± 0.003     | 0.21± 0.002 | 1.81± 0.038          | 2.77± 0.033      |
| 4         | Dates      | 1.71± 0.012                 | 1.62± 0.018        | 1.73± 0.027      | 0.44± 0.009               | 0.43± 0.005          | 0.46± 0.008     | 0.27± 0.003          | 2.01± 0.021        | 2.85± 0.047        | 1.89± 0.021          | 0.88± 0.012      | 0.85± 0.011    | 0.86± 0.014      | 0.21± 0.001  | 0.18± 0.001     | 0.19± 0.003 | 0.91± 0.013          | 0.95± 0.015      |
| 5         | Dates      | 3.89± 0.039                 | 3.85± 0.048        | 3.87± 0.051      | 1.08± 0.011               | 1.29± 0.018          | 1.24± 0.024     | 0.37± 0.005          | 2.87± 0.042        | 1.48± 0.031        | 1.84± 0.027          | 0.93± 0.011      | 0.95± 0.016    | 0.94± 0.016      | 0.77± 0.012  | 0.86± 0.007     | 0.74± 0.012 | 1.65± 0.017          | 3.61± 0.069      |
| 6         | Vegtables  | 1.44± 0.011                 | 1.48± 0.021        | 1.49± 0.028      | 0.49± 0.003               | 0.42± 0.005          | 0.46± 0.008     | 0.17± 0.002          | 0.69± 0.011        | 0.71± 0.018        | 0.68± 0.013          | 0.56± 0.014      | 0.52± 0.012    | 0.54± 0.006      | 0.16± 0.002  | 0.16± 0.002     | 0.17± 0.002 | 1.67± 0.021          | 2.62± 0.043      |
| 7         | Vegtables  | 2.28± 0.024                 | 2.71± 0.019        | 2.69± 0.031      | 1.12± 0.014               | 1.16± 0.023          | 1.14± 0.017     | 0.29± 0.002          | 1.78± 0.018        | 2.89± 0.044        | 1.81± 0.019          | 0.46± 0.018      | 0.49± 0.017    | 0.42± 0.012      | 0.09± 0.002  | 0.09± 0.002     | 0.08± 0.001 | 1.29± 0.024          | 2.81± 0.027      |
| 8         | Vegtables  | 2.81± 0.027                 | 2.89± 0.044        | 2.78± 0.016      | 1.22± 0.012               | 1.25± 0.025          | 1.24± 0.016     | 0.21± 0.003          | 2.06± 0.022        | 1.22± 0.016        | 1.42± 0.034          | 0.64± 0.014      | 0.62± 0.011    | 0.66± 0.006      | 0.11± 0.003  | 0.12± 0.003     | 0.11± 0.002 | 1.27± 0.017          | 2.71± 0.029      |
| 9         | Vegtables  | 1.22± 0.013                 | 1.22± 0.037        | 1.26± 0.011      | 0.44± 0.0017              | 0.43± 0.004          | 0.42± 0.005     | 0.22± 0.003          | 0.56± 0.013        | 0.56± 0.018        | 0.54± 0.012          | 0.24± 0.004      | 0.22± 0.006    | 0.27± 0.003      | 0.07± 0.001  | 0.08± 0.002     | 0.07± 0.003 | 1.19± 0.031          | 2.78± 0.018      |
| 10        | Vegtables  | 1.78± 0.017                 | 1.76± 0.021        | 1.79± 0.025      | 0.38± 0.004               | 0.32± 0.003          | 0.37± 0.004     | 0.16± 0.002          | 1.78± 0.025        | 1.71± 0.041        | 1.73± 0.015          | 0.42± 0.006      | 0.44± 0.004    | 0.43± 0.002      | 0.31± 0.003  | 0.33± 0.004     | 0.35± 0.009 | 1.22± 0.016          | 1.26± 0.019      |

**Table S2.** Standard deviation of residual pesticides in the original three soil samples.

| Treatment time /h | Chlorpyrifos | Dimethoate | Atrazine    | Heptachlor | Methomyl |
|-------------------|--------------|------------|-------------|------------|----------|
| 0                 | 0.010128535  | 0.012494   | 0.013255814 | 0.0148780  | 0.019252 |
| 2                 | 0.004421594  | 0.007662   | 0.008165375 | 0.0116376  | 0.009889 |
| 4                 | 0.007069409  | 0.008208   | 0.00754522  | 0.0099303  | 0.008726 |
| 6                 | 0.003059126  | 0.004779   | 0.00503876  | 0.0079443  | 0.006066 |
| 8                 | 0.00503856   | 0.004104   | 0.00498708  | 0.0074216  | 0.006177 |
| 10                | 0.005861183  | 0.002468   | 0.003204134 | 0.0025784  | 0.004017 |
| 12                | 0.003161954  | 0.003013   | 0.003565891 | 0.0055052  | 0.004765 |
| 14                | 0.002339332  | 0.003039   | 0.005813953 | 0.0059930  | 0.006066 |
| 16                | 0.003213368  | 0.006961   | 0.006770026 | 0.0043554  | 0.008144 |
| 18                | 0.00377892   | 0.005532   | 0.003979328 | 0.0046690  | 0.004044 |
| 20                | 0.004601542  | 0.002571   | 0.004082687 | 0.0030662  | 0.005928 |
| 22                | 0.004652956  | 0.003403   | 0.002144703 | 0.0049477  | 0.006565 |
| 24                | 0.002107969  | 0.005558   | 0.005503876 | 0.0064808  | 0.004183 |
| 26                | 0.001902314  | 0.005221   | 0.002971576 | 0.0042160  | 0.002604 |
| 28                | 0.002879177  | 0.003013   | 0.004056848 | 0.0095122  | 0.003934 |
| 30                | 0.003496144  | 0.004857   | 0.002428941 | 0.0077352  | 0.004848 |
| 32                | 0.004678663  | 0.004364   | 0.00255814  | 0.0040767  | 0.00867  |
| 34                | 0.001773779  | 0.002961   | 0.004418605 | 0.0036585  | 0.005512 |
| 36                | 0.003521851  | 0.006104   | 0.005813953 | 0.0044948  | 0.003823 |
| 38                | 0.002930591  | 0.005506   | 0.004806202 | 0.0064808  | 0.004765 |
| 40                | 0.004473008  | 0.003039   | 0.003229974 | 0.0049826  | 0.00313  |

|    |             |          |             |           |          |
|----|-------------|----------|-------------|-----------|----------|
| 44 | 0.002596401 | 0.004623 | 0.00501292  | 0.0048084 | 0.005956 |
| 48 | 0.003290488 | 0.00239  | 0.00250646  | 0.0087456 | 0.003518 |
| 52 | 0.002956298 | 0.002519 | 0.002997416 | 0.0074564 | 0.004737 |
| 56 | 0.006503856 | 0.005532 | 0.001472868 | 0.0059930 | 0.00241  |
| 60 | 0.001953728 | 0.002286 | 0.001317829 | 0.0030314 | 0.003657 |
| 64 | 0.00251928  | -        | -           | 0.0074564 | 0.004958 |
| 68 | 0.003059126 | -        | -           | 0.0064460 | 0.003629 |
| 72 | 0.001825193 | -        | -           | 0.0045993 | 0.004377 |
| 76 | 0.003753213 | -        | -           | 0.0097909 | 0.003906 |
| 80 | 0.001465296 | -        | -           | 0.0078049 | -        |

**Table S3.** Standard deviation of residual pesticides in the three soil samples with 1% TiO<sub>2</sub> catalyst.

| Treatment time /h | Chlorpyrifos | Dimethoate | Atrazine | Heptachlor | Methomyl |
|-------------------|--------------|------------|----------|------------|----------|
| 0                 | 0            | 0          | 0        | 0          | 0        |
| 2                 | 0.000903     | 0.000912   | 0.001292 | 0.000805   | 0.00089  |
| 4                 | 0.000785     | 0.001431   | 0.000538 | 0.000697   | 0.00167  |
| 6                 | 0.001824     | 0.000937   | 0.000789 | 0.001256   | 0.002079 |
| 8                 | 0.002094     | 0.001039   | 0.001034 | 0.001256   | 0.001575 |
| 10                | 0.001039     | 0.003931   | 0.000298 | 0.000877   | 0.001394 |
| 12                | 0.003764     | 0.00105    | 0.000789 | 0.001844   | 0.000973 |
| 14                | 0.002104     | 0.001039   | 0.000895 | 0.000532   | 0.000973 |

|    |          |          |          |          |          |
|----|----------|----------|----------|----------|----------|
| 16 | 0.001673 | 0.000687 | 0.000789 | 0.002372 | 0.002091 |
| 18 | 0.00107  | 0.0003   | 0.001126 | 0.001224 | 0.001394 |
| 20 | 0.000785 | 0.001587 | 0.002073 | 0.000604 | 0.000973 |
| 22 | 0.001121 | -        | 0.000831 | 0.001064 | 0.001946 |

**Table S4.** Standard deviation of residual pesticides in the three soil samples with 1% ZnO catalyst.

| Treatment time /h | Chlorpyrifos | Dimethoate | Atrazine | Heptachlor | Methomyl |
|-------------------|--------------|------------|----------|------------|----------|
| 0                 | 0            | 0          | 0        | 0          | 0        |
| 2                 | 0.00068      | 0.000654   | 0.000684 | 0.000877   | 0.00167  |
| 4                 | 0.000903     | 0.002995   | 0.001833 | 0.001064   | 0.001526 |
| 6                 | 0.001028     | 0.000937   | 0.000775 | 0.001788   | 0.001269 |
| 8                 | 0.000826     | 0.000912   | 0.00233  | 0.001064   | 0.00064  |
| 10                | 0.001285     | 0.001132   | 0.000775 | 0.001319   | 0.001685 |
| 12                | 0.000927     | 0.000937   | 0.001076 | 0.001064   | 0.001421 |
| 14                | 0.000647     | 0.000912   | 0.001044 | 0.000201   | 0.00016  |
| 16                | 0.000771     | 0.000654   | 0.003663 | 0.001597   | 0.001466 |
| 18                | 0.005545     | 0.000779   | 0.002442 | 0.001408   | 0.00089  |
| 20                | 0.000973     | 0.001281   | 0.000395 | 0.001224   | 0.001153 |
| 22                | 0.000771     | 0.002357   | 0.001126 | 0.001919   | 0.001816 |
| 24                | 0.000514     | 0.000794   | 0.001044 | 0.00112    | 0.000973 |
